# Supplementary material
Source: PubMed Central journal article supplement (PMC3772386)
Supplement: supp_jcs.121590_JCS121590.pdf [file supp_jcs.121590_JCS121590.pdf]

**Supplementary data:**

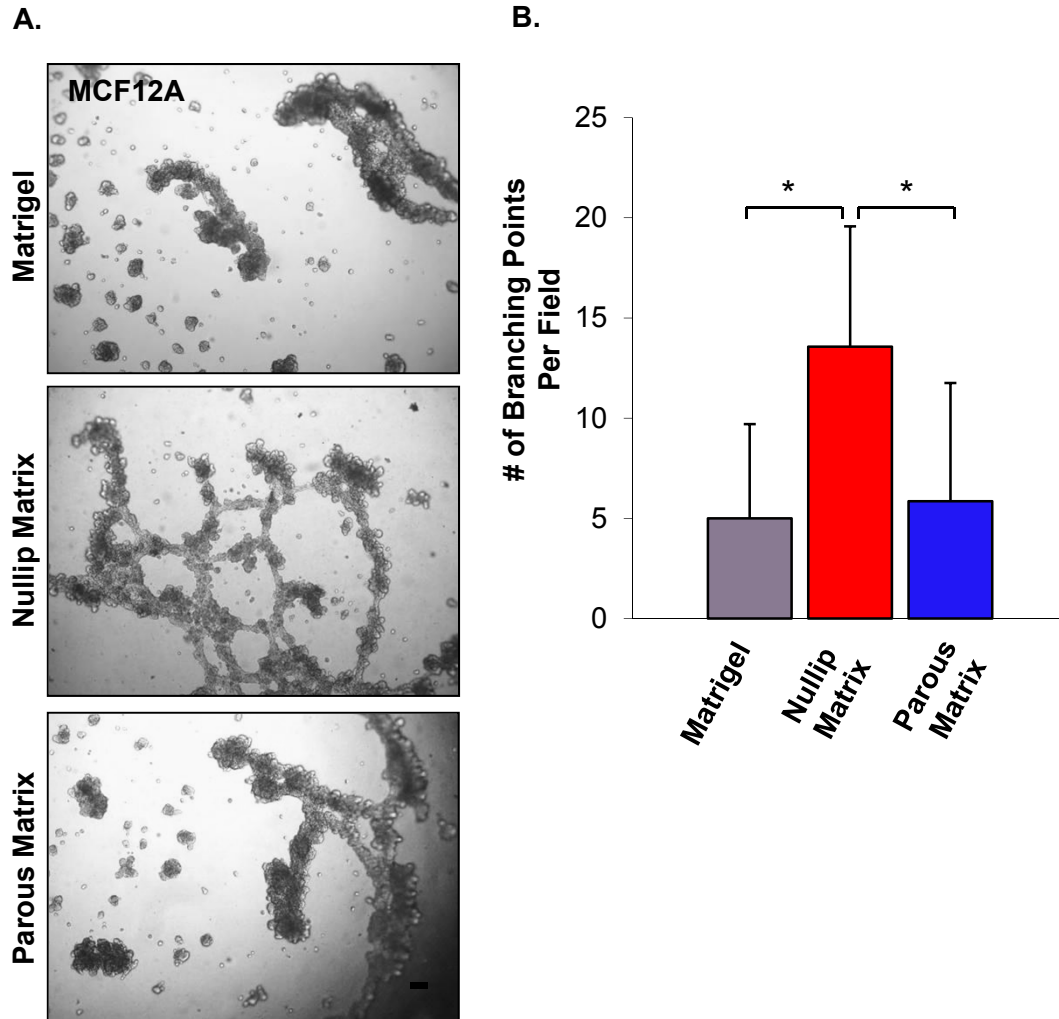

**Figure S1**

**Mammary ECM supports the formation of complex epithelial structures *in vitro*.**

(A) Brightfield images of immortalized, non-transformed, human mammary epithelial MCF12A cells mixed with 200 $\mu$ g/mL of Matrigel, or mammary ECM isolated from nulliparous or parous rats and plated on Matrigel pads in 3D cell culture as previously described. Briefly, 45,000 MCF12A cells were plated on 3D 1:1 matrix pad of 200  $\mu$ g/mL endogenous mammary ECM to 9.7-10mg/mL Matrigel<sup>TM</sup> for 24-48 hrs as described in Hattar et al. Breast Cancer Research, 2009. The images were taken after 48 hours in culture. Scale bar, 100 $\mu$ m. (B) A quantitative analysis of the number of branching points as a measurement of epithelial structure complexity. N=3 wells per condition \*p<0.05, ANOVA with Bonferroni multiple comparisons posttest.

**A.**

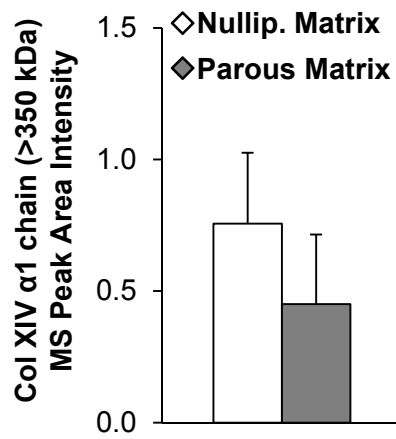

**B.**

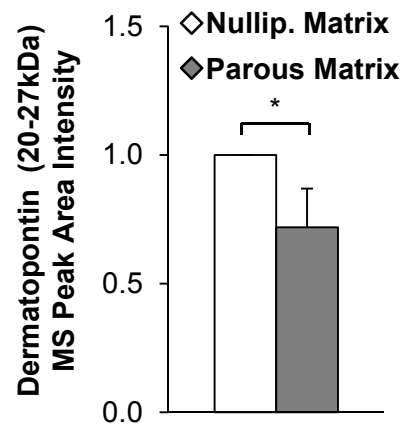

**Figure S2**

**Evidence for parity induced changes in mammary ECM. (A and B)** Changes in collagen XIV and dermatopontin abundance were assessed in rat nulliparous or parous matrices by MS-based proteomics and label-free quantitative analysis). Means are calculated from an N=3-5. \* $p < 0.05$ , One Sample t-test.

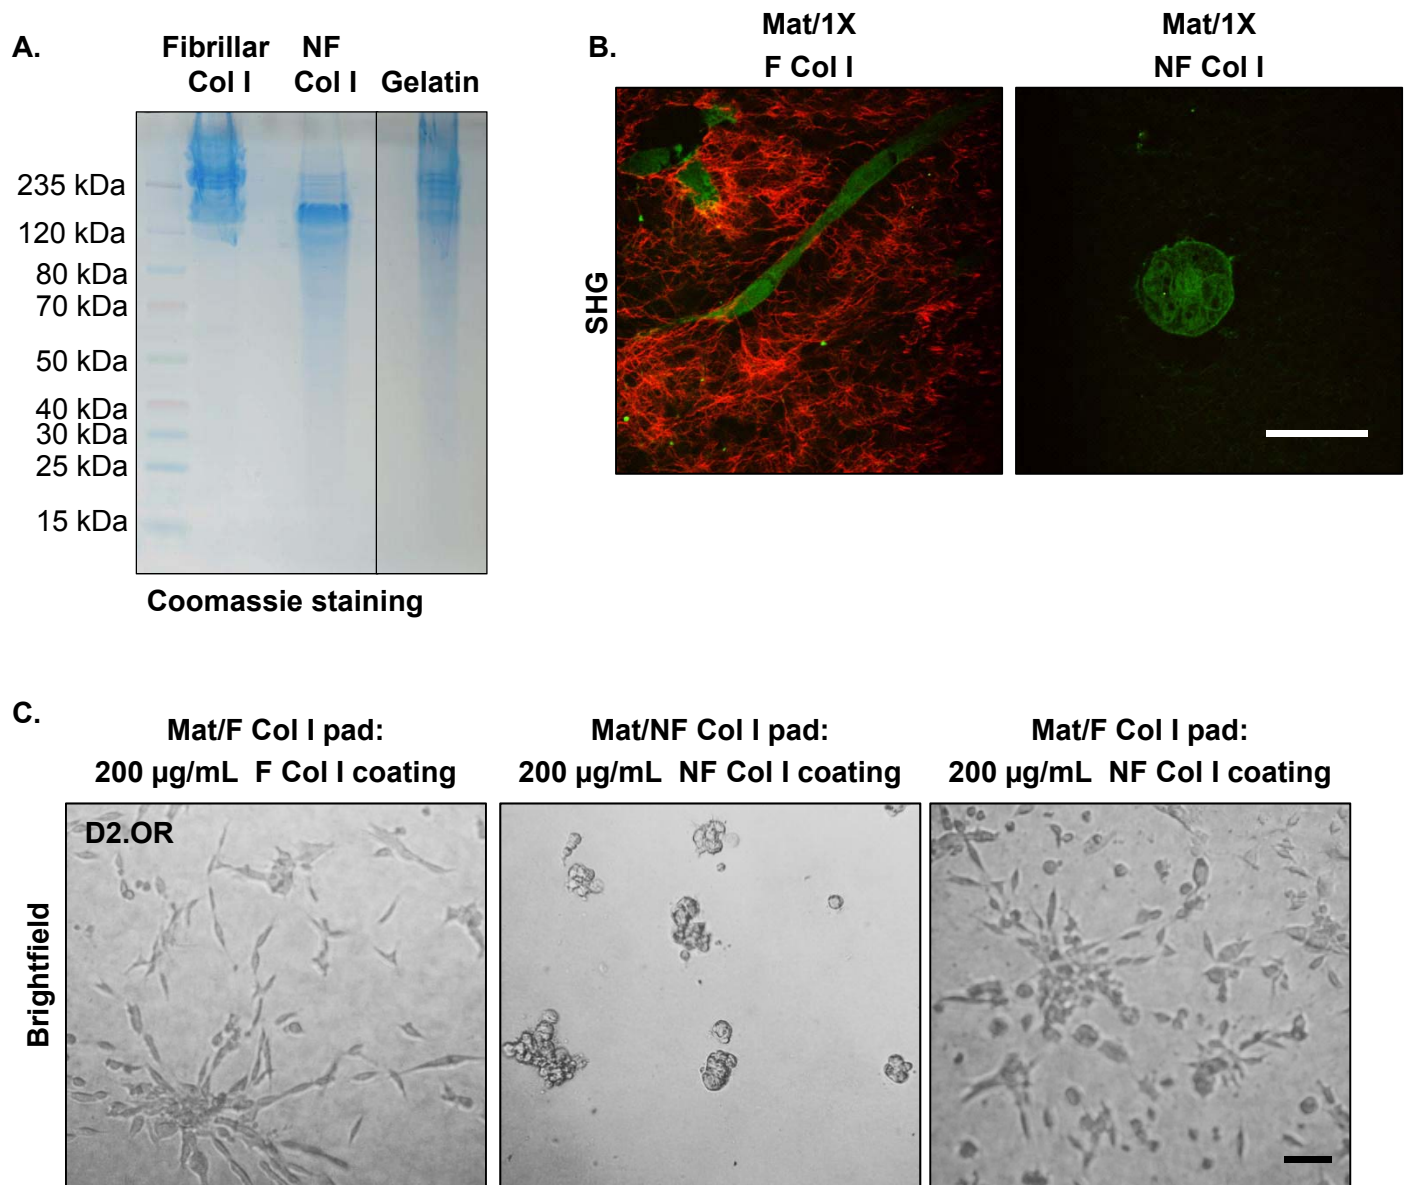

**Figure S3**

**Moderate sonication of collagen I inhibits invasive phenotype.** (A) Fibrillar and non-fibrillar (NF) collagen I as well as gelatin were evaluated in non-reduced denatured 4-12% SDS-PAGE gel stained with coomassie. Samples were ran on the same gel. (B) D2.OR cells cultured in Mat/ 1X F Col I or Mat/ 1X NF Col I for 6 days, fixed, and then visualized via SHG imaging to assess collagen I organization. Red indicates SHG signal and green is autofluorescence. Scale bar, 25µm. Model #2 was used to perform this 3D cell culture experiment. (C) Brightfield images of D2.OR cells coated with fibrillar and NF collagen I and cultured for 4-6 days as previously described. Briefly, 3D matrix pads were prepared from 4 mg/mL Matrigel or 1.5:1 ratio of 4 mg/mL of Matrigel to 4 mg/mL of fibrillar or NF collagen I with a total volume of 100 µL. Then, 2,000 D2.OR cells were mixed with 200 µg/mL fibrillar or NF collagen I and plated on the polymerized 3D matrix pads, as described in Barkan et al. Cancer Research, 2008. Representative images, N=3 wells per condition. Scale bar, 100µm.

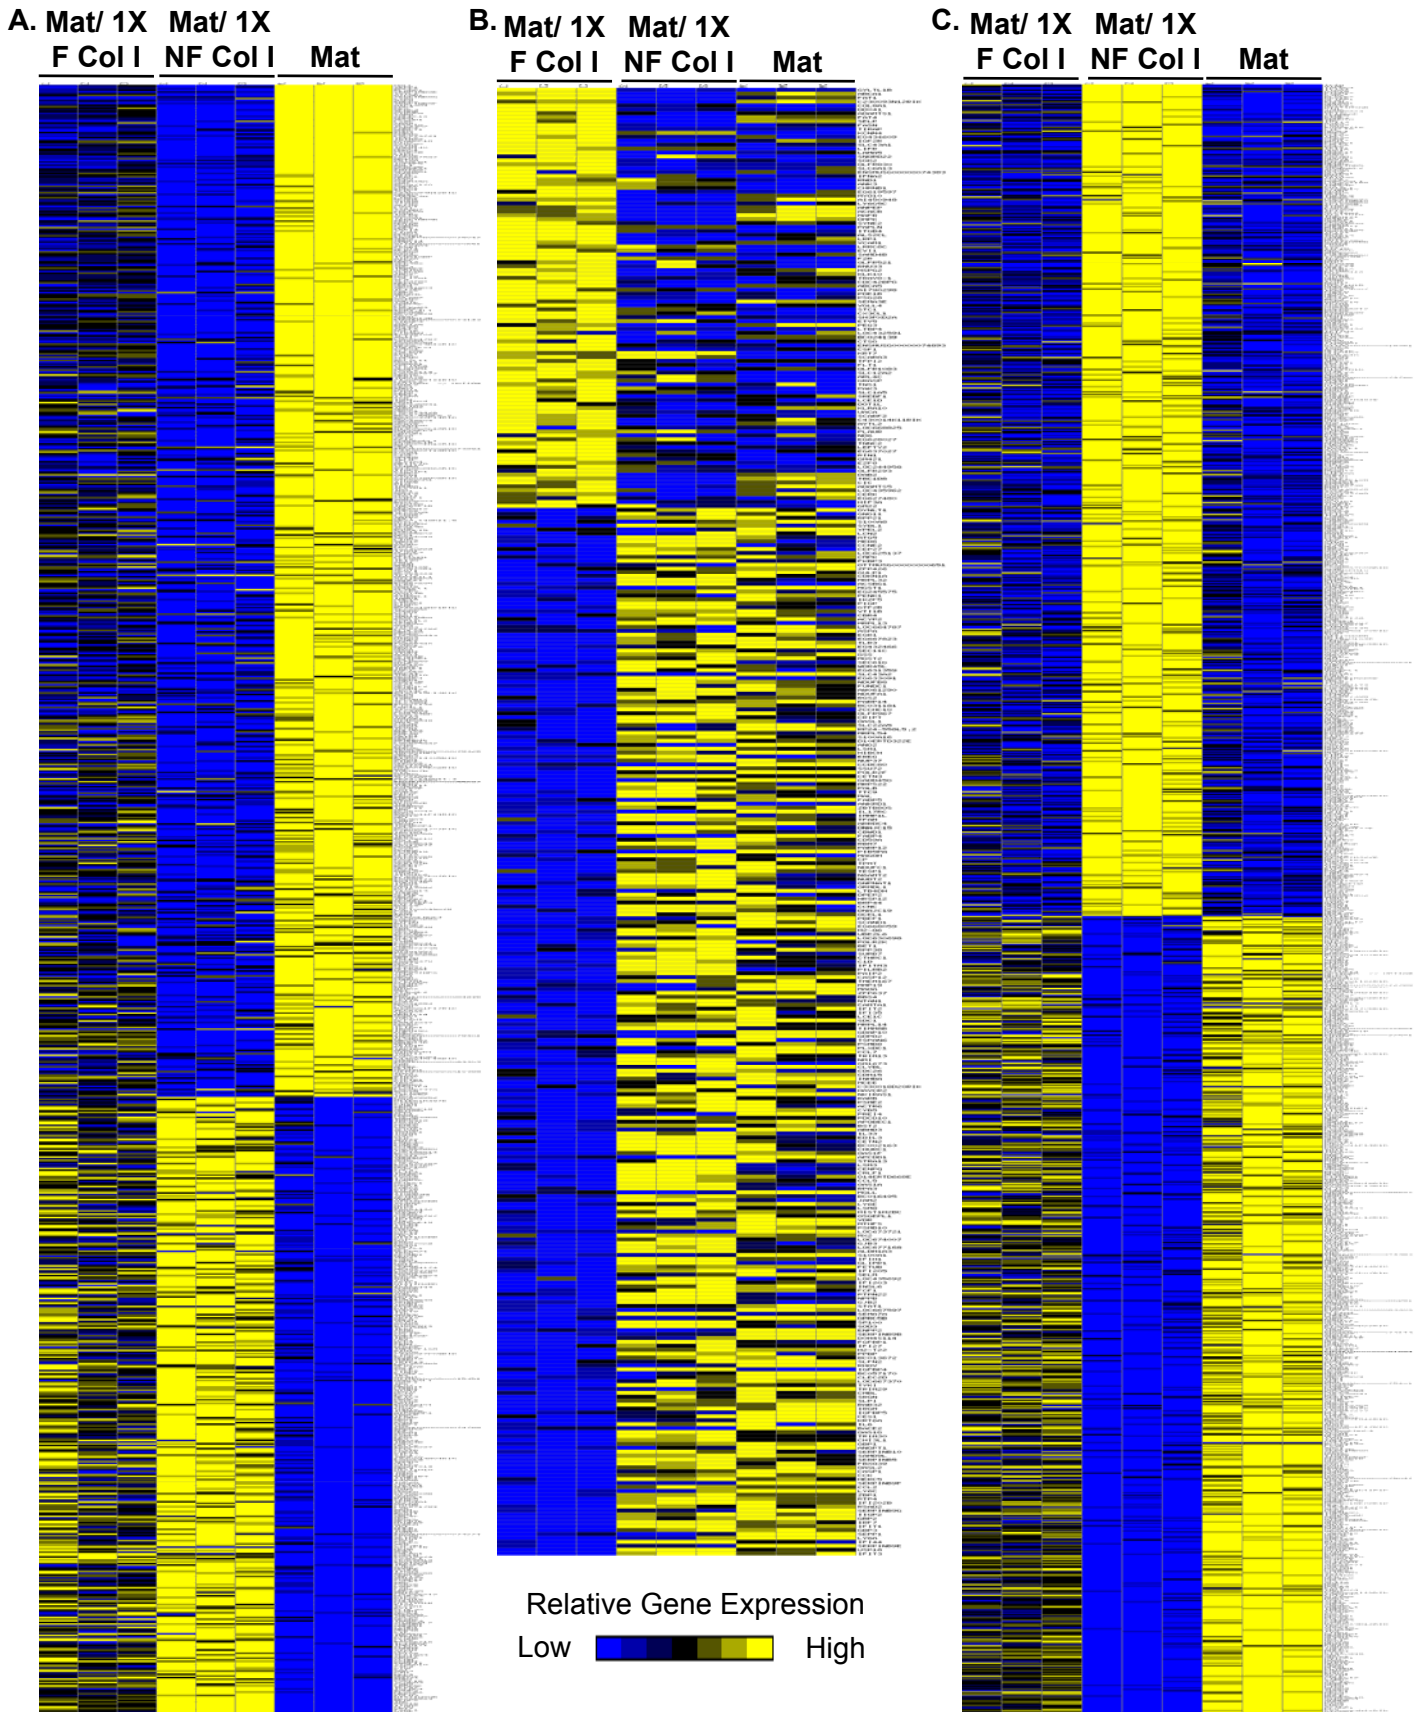

**Figure S4**  
**Distinct gene signatures for Matrigel or Matrigel/ Col I conditions.** Heat maps for specific gene signatures for D2.OR cells cultured for 4 days in Matrigel (A) , Mat/ 1X F Col I (B) or Mat/ 1X NF Col I (C).

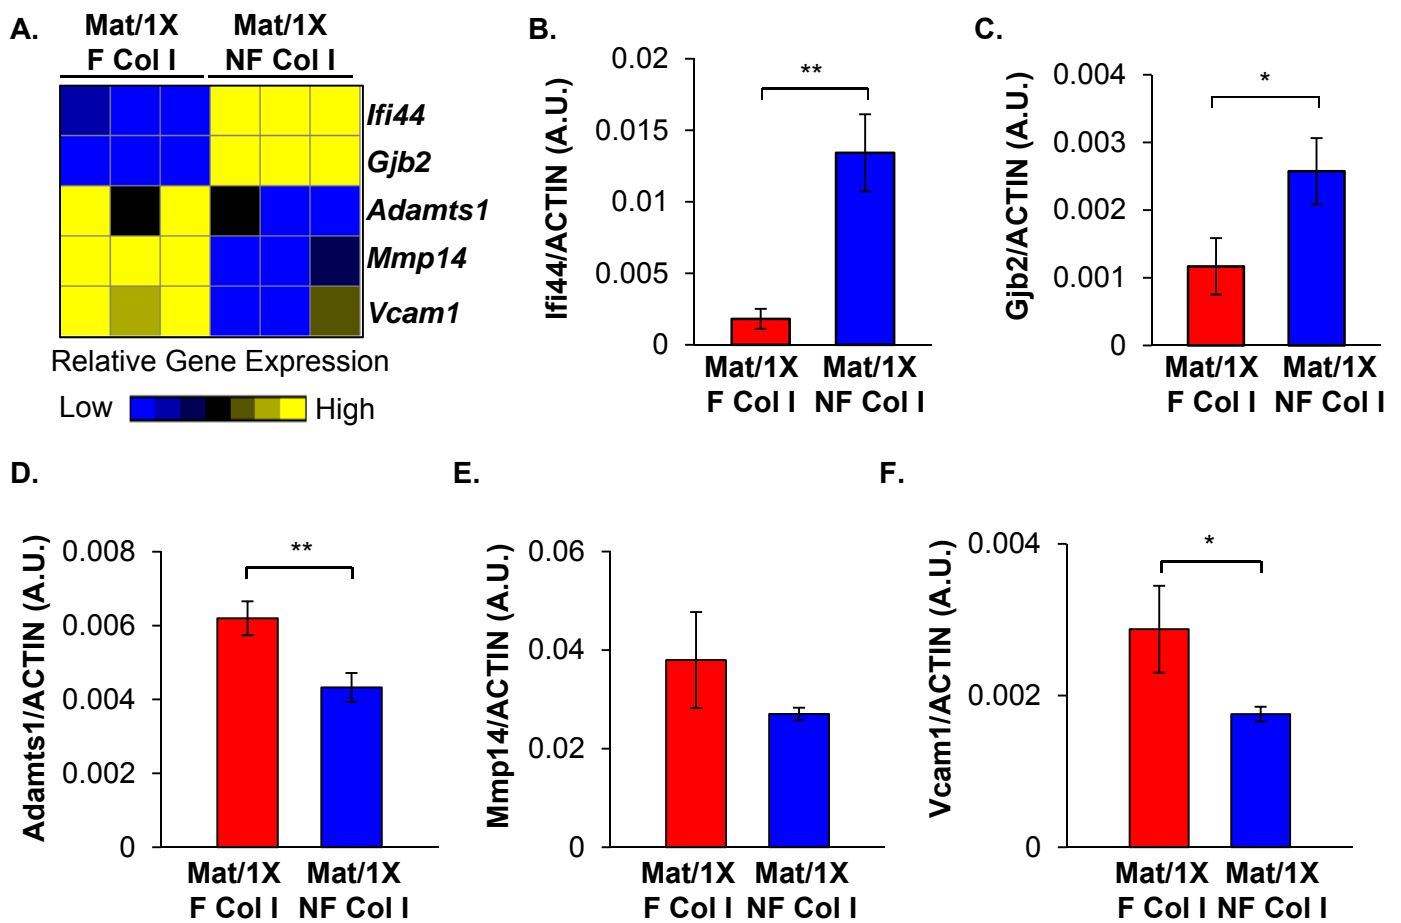

**Figure S5**

**Validation by RT-PCR of differences in expression levels of selected genes identified in the transcriptome microarray analysis.** (A) Heat map of selected genes from the transcriptome microarray study. Yellow indicates upregulation and blue downregulation of gene expressions. (B-F) Differences in gene expressions identified in (A) were validated by quantitative RT-PCR. N=3 samples from an independent experiment. \*p<0.05, \*\*p<0.01, unpaired t-test. Model #2 was used to perform this 3D cell culture experiment.

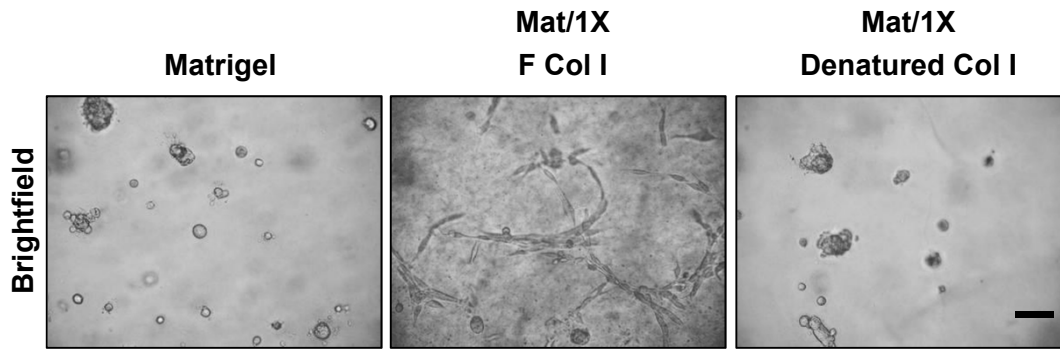

**Figure S6**

**Fibrillar collagen I organization is required for elongated/stellate cell morphology.** Brightfield images of D2.OR cells in Matrigel, Mat/ F Col I and Mat/denatured collagen (gelatin). Representative images, N=3 wells per condition Scale bars, 100 $\mu$ m. Model #2 was used to perform this 3D cell culture experiment and Gelatin (Sigma), denatured collagen, was also used at final concentration of 1.6mg/mL.

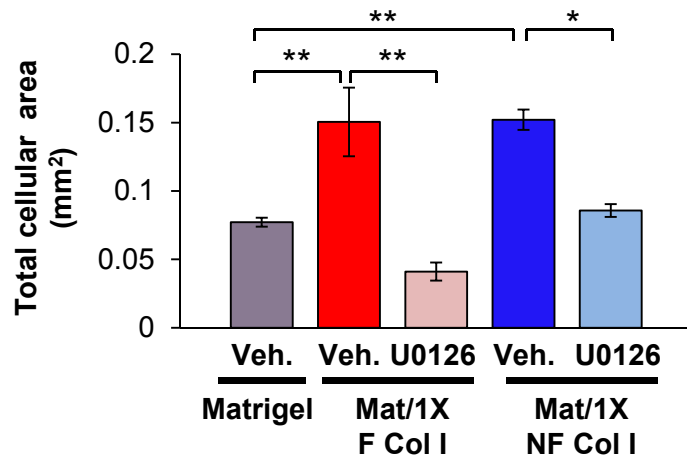

**Figure S7**

**Collagen I promotes ERK1/2-mediated proliferation.** D2.OR cells were treated with vehicle (Veh.) or MEK1/2 inhibitor (U0126) and cultured in Matrigel, Mat/ 1X F Col I collagen I or Mat/ 1X NF Col I for 6 days. Total cell areas were assessed using brightfield images and quantified via ImageJ. Total cellular area were quantified from 3-4 images per well and 3 wells per conditions were used. \* $p < 0.01$ , \*\* $p < 0.001$ , ANOVA with Bonferroni multiple comparisons posttest. Model #2 was used to perform this 3D cell culture experiment.

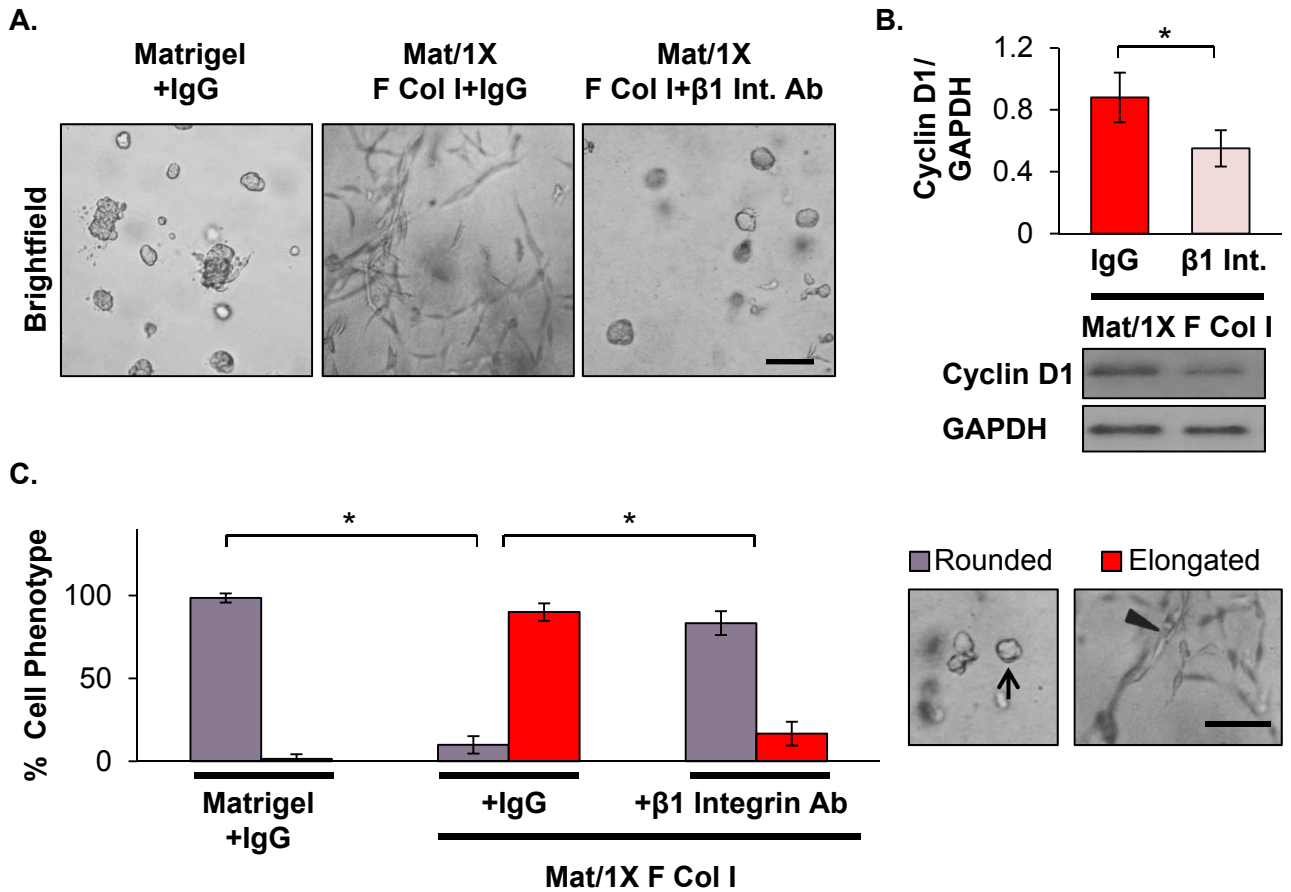

**Figure S8**

**Blocking  $\beta 1$  integrin decreases tumor cell proliferation and reverts elongated cell morphology.**

(A) Representative brightfield images of D2.OR cells treated with IgG or  $\beta 1$  integrin blocking antibody and cultured in Matrigel and Mat/ 1X F Col I until day 4. (B) Cyclin D1 levels in IgG and  $\beta 1$  integrin blocking antibody conditions evaluated by IB. N=4 wells per condition, \*  $p < 0.02$ , unpaired t-test. (C) Morphological quantitative analyses were performed on brightfield images from conditions described in (A). Arrow and arrowhead point to rounded and elongated structures, respectively. Statistical values are \*  $p < 0.001$ , ANOVA with Bonferroni multiple comparisons posttest. Scale bars, 100 $\mu$ m. Model #2 was used to perform this 3D cell culture experiment.



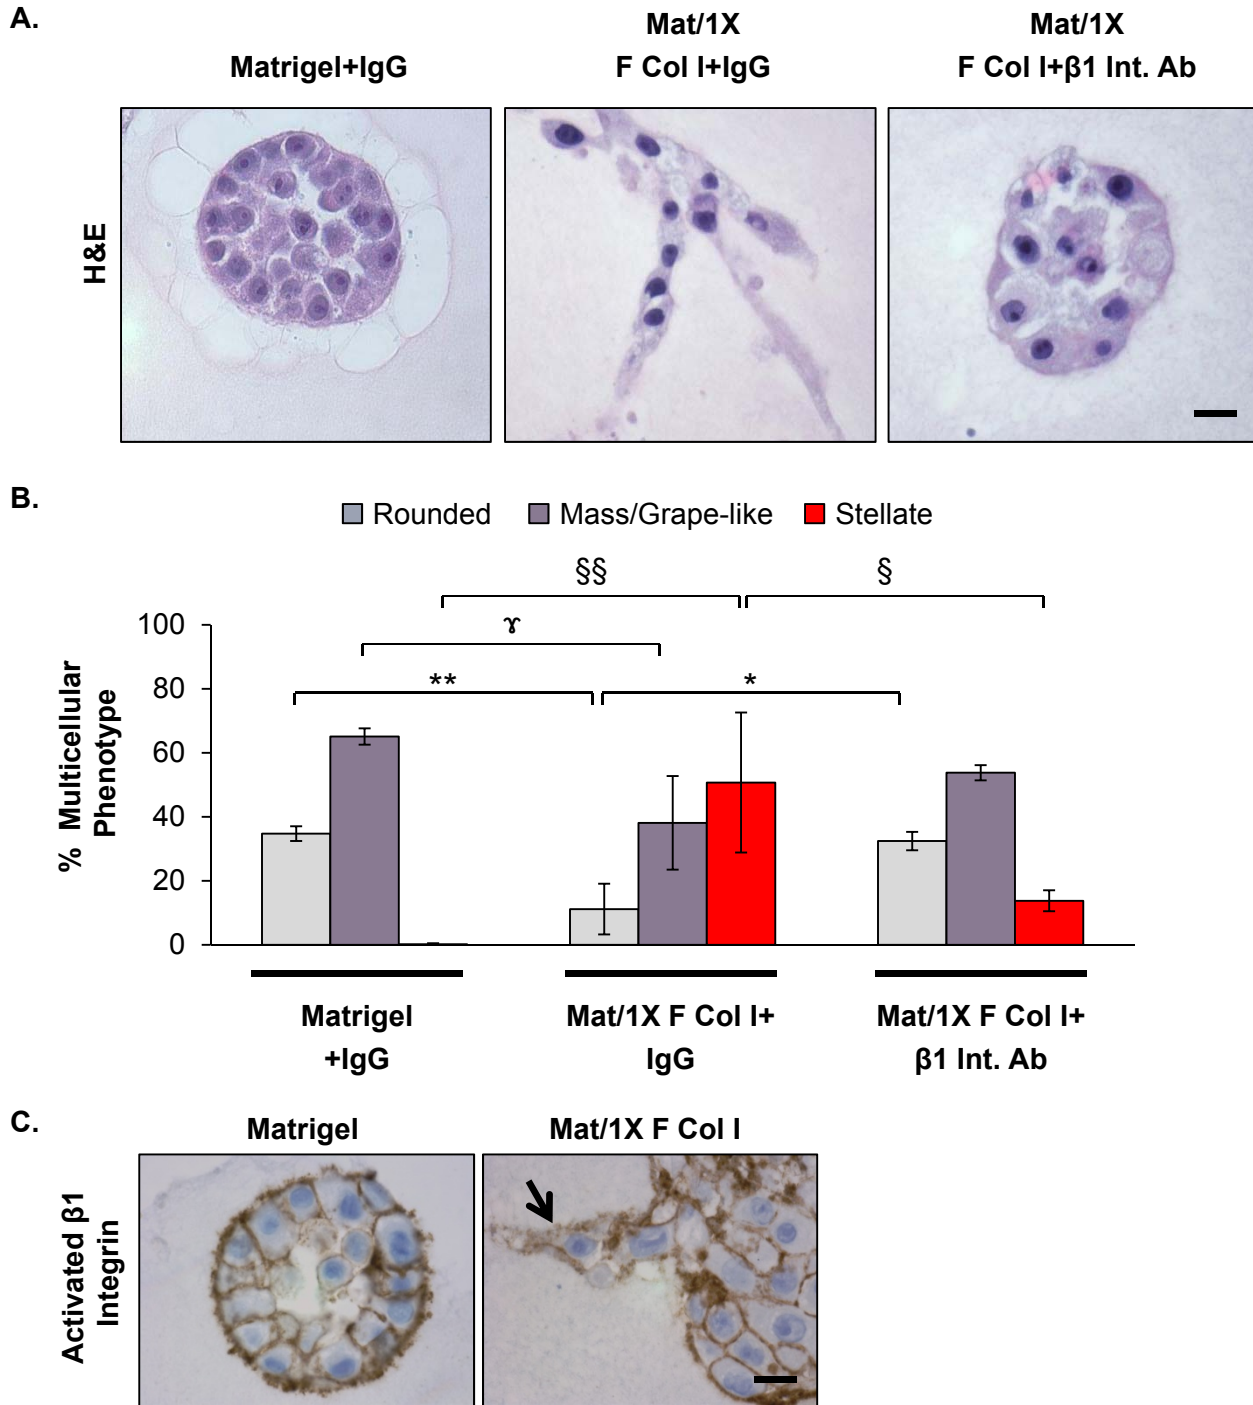

**Figure S9**

**Fibrillar collagen I influences invasive morphology of breast cancer MCF10DCIS cells via β1 integrin signaling.** (A) Representative H&E images of MCF10DCIS cells cultured in Matrigel or Mat/ 1X F Col I treated with IgG or β1 integrin blocking antibody. (B) Morphological quantitative analyses were performed on brightfield images from conditions described in (A). N=3 well per condition and 3-4 images per well. §, γ, or \*p<0.05, §§ or \*\*p<0.01, ANOVA with Bonferroni multiple comparisons posttest. (C) Activated β1 integrin staining on MCF10DCIS cells cultured in Matrigel or fibrillar collagen I via IHC. Arrow points to changes in β1 integrin distribution in elongated tumor cell. Scale bar represents 20μm. Model #2 was used to perform this 3D cell culture experiment.

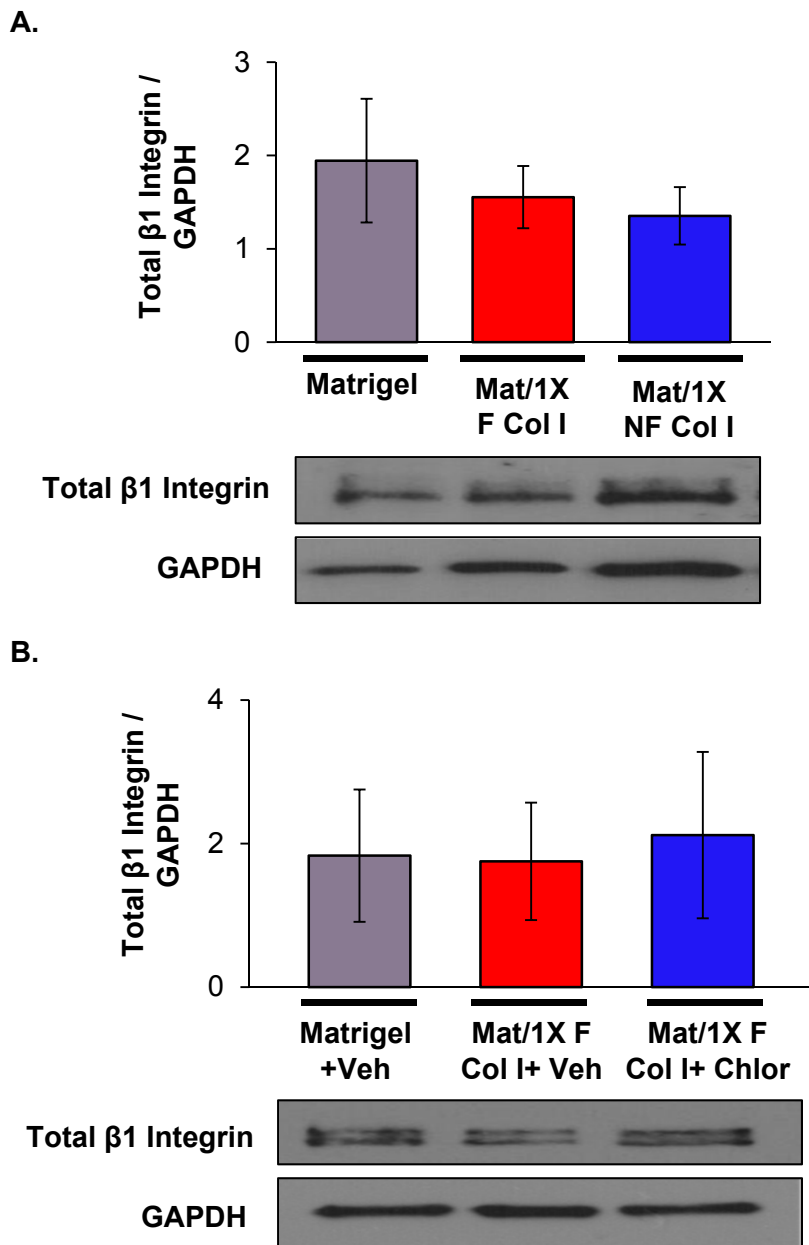

**Figure S10**

**Collagen I organization does not alter protein levels of total β1 integrin.** (A and B) Total β1 integrin was evaluated by IB from lysates of D2.OR cells cultured in Matrigel, Mat/ 1X F Col I or Mat/ 1X NF Col I for 4 days. N=3 wells per condition, no significance differences were found by statistical evaluation. (B) D2.OR cells cultured in Matrigel or fibrillar collagen I treated with vehicle (Veh) or chlorpromazine (Chlor), a clathrin-dependent endocytotic inhibitor. Model #2 was used to perform this 3D cell culture experiment.

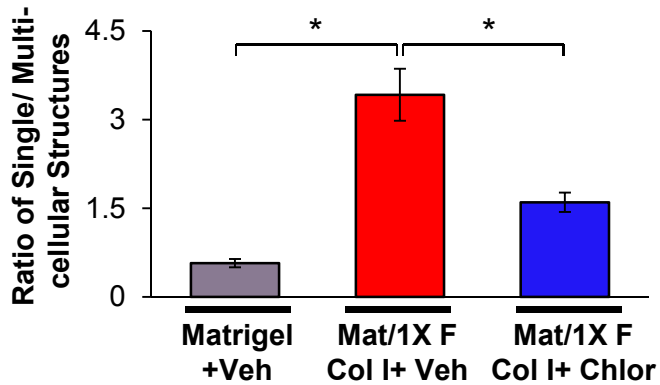

**Figure S11**

**Clathrin-dependent endocytotic inhibition decreases the relative amount of singular cells to multicellular structures.** D2.OR cells cultured in Matrigel or Mat/ 1X F Col I treated with vehicle (Veh) or chlorpromazine (Chlor) in 3D cell culture. Evaluating the ratios between singular cell number and multicellular structure number for each condition. N=3 wells per group, \*p<0.001, ANOVA with Bonferroni multiple comparisons posttest. Model #2 was used to perform this 3D cell culture experiment.

**Table S1**

**Differences in mammary ECM proteomes between nulliparous and parous rats were identified via mass spectrometry-based proteomics and label-free quantitation**

| Ranking | Identified Proteins               | Accession Number | Molecular Weight | Avg TIC | p Value | Spect Counts | p Value |
|---------|-----------------------------------|------------------|------------------|---------|---------|--------------|---------|
| 1       | Collagen, type I, alpha 1         | IPI00188909      | 138 kDa          | -1.05   | 0.998   | 1.03         | 0.9454  |
| 4       | Collagen, type I, alpha 2         | IPI00188921      | 130 kDa          | 1.07    | 0.824   | 1.06         | 0.7631  |
| 13      | Collagen, type III, alpha 1       | IPI00366944      | 139 kDa          | -1.01   | 0.808   | 1.07         | 0.8604  |
| 397     | Collagen, type V, alpha 1         | IPI00201608      | 184 kDa          | 2.66    | 0.901   | 1.28         | 0.8456  |
| 441     | Collagen, type V, alpha 2         | IPI00366945      | 145 kDa          | -1.05   | 0.419   | 1.05         | 0.2554  |
| 19      | Collagen, type VI, alpha 1        | IPI00371853      | 110 kDa          | -1.31   | 0.162   | -1.32        | 0.0448  |
| 30      | Collagen, type VI, alpha 2        | IPI00372839      | 110 kDa          | -1.20   | 0.194   | -1.34        | 0.0018  |
| 2       | Collagen, type VI, alpha 3        | IPI00565677      | 288 kDa          | -1.30   | 0.196   | -1.41        | 0.0238  |
| 462     | Collagen, type VI, alpha 3        | IPI00765205      | 240 kDa          | -2.36   | 0.250   | -1.74        | 0.5564  |
| 423     | Collagen, type VI, alpha 6        | IPI00778143 (+1) | 247 kDa          | -1.13   | 0.770   | -1.22        | 0.8492  |
| 330     | Collagen, type VII, alpha 1       | IPI00767686      | 295 kDa          | 6.20    | 0.986   | 2.59         | 0.7002  |
| 172     | Collagen, type XII alpha 1        | IPI00958129 (+1) | 333 kDa          | 3.05    | 0.642   | -1.39        | 0.3723  |
| 5       | Collagen, type XIV, alpha 1       | IPI00360766 (+1) | 192 kDa          | -1.09   | 0.503   | -1.16        | 0.1405  |
| 81      | Collagen, type XV, alpha 1        | IPI00364868      | 138 kDa          | -1.03   | 0.837   | -1.03        | 0.8609  |
| 483     | Laminin, alpha 1                  | IPI00363534      | 338 kDa          | 1.35    | 0.080   | -1.36        | 0.2148  |
| 168     | Laminin, alpha 2                  | IPI00361301      | 343 kDa          | 1.49    | 0.483   | 1.24         | 0.8619  |
| 76      | Laminin, alpha 4 (Fragment)       | IPI00361106      | 176 kDa          | -1.13   | 0.601   | -1.02        | 0.8227  |
| 431     | Laminin, alpha 5                  | IPI00190577      | 404 kDa          | -3.10   | 0.001   | -1.98        | 0.4993  |
| 109     | Laminin beta 1                    | IPI00365542      | 203 kDa          | -1.05   | 0.891   | 1.05         | 0.7528  |
| 44      | Laminin, beta 2                   | IPI00212868      | 196 kDa          | 1.14    | 0.564   | -1.03        | 0.8718  |
| 57      | Laminin, gamma 1                  | IPI00363849      | 177 kDa          | -1.07   | 0.758   | -1.06        | 0.8414  |
| 264     | Adiponectin                       | IPI00202515      | 26 kDa           | -1.03   | 0.519   | -1.09        | 0.5835  |
| 86      | Asporin                           | IPI00365784      | 43 kDa           | 1.62    | 0.472   | -1.29        | 0.0755  |
| 34      | Biglycan                          | IPI00191090      | 42 kDa           | -1.18   | 0.148   | -1.03        | 0.8794  |
| 214     | Bone marrow proteoglycan          | IPI00206023      | 25 kDa           | -1.34   | 0.232   | -1.27        | 0.2984  |
| 8       | Decorin                           | IPI00199861      | 40 kDa           | -1.25   | 0.009   | -1.18        | 0.1362  |
| 79      | Dermatopontin                     | IPI00371512      | 24 kDa           | -1.30   | 0.354   | -1.48        | 0.0482  |
| 816     | Elastin microfibril interfacier 2 | IPI00764937 (+1) | 126 kDa          | -1.90   | 0.299   | -1.61        | 0.3764  |
| 29      | Fibrillin1                        | IPI00951429      | 312 kDa          | -1.23   | 0.467   | -1.19        | 0.4367  |
| 33      | Fibronectin 1                     | IPI00231984      | 260 kDa          | -1.20   | 0.375   | -1.36        | 0.0051  |
| 588     | Fibronectin type III domain       | IPI00358887      | 194 kDa          | 1.85    | 0.507   | 1.06         | 0.7787  |
| 219     | Fibulin-5                         | IPI00326179      | 50 kDa           | -1.01   | 0.829   | -1.06        | 0.4748  |

## Continued

|     |                                 |             |         |         |         |         |          |
|-----|---------------------------------|-------------|---------|---------|---------|---------|----------|
| 37  | HSPG (Fragment)                 | IPI00210360 | 394 kDa | ↘ -1.17 | ▬ 0.586 | ↘ -1.03 | ▬ 0.6026 |
| 132 | HSPG2, Perlecan (Fragment)      | IPI01016479 | 375 kDa | ↘ -1.09 | ▬ 0.827 | ↘ -1.17 | ▬ 0.4994 |
| 11  | Lumican                         | IPI00206403 | 38 kDa  | ↘ -1.02 | ▬ 0.957 | ↘ -1.08 | ▬ 0.7305 |
| 535 | Matrix Gla protein              | IPI00211401 | 12 kDa  | ↗ 12.00 | ▬ 0.003 | ↗ 6.48  | ▬ 0.0022 |
| 65  | Nidogen 1                       | IPI00231136 | 137 kDa | ↘ 1.11  | ▬ 0.779 | ↘ 1.09  | ▬ 0.6590 |
| 94  | Nidogen-2                       | IPI00372786 | 153 kDa | ↘ 1.01  | ▬ 0.998 | ↘ 1.22  | ▬ 0.7589 |
| 17  | Osteoglycin                     | IPI00362931 | 34 kDa  | ↘ -1.25 | ▬ 0.267 | ↘ -1.29 | ▬ 0.0480 |
| 28  | Periostin                       | IPI00567560 | 93 kDa  | ↘ -1.63 | ▬ 0.003 | ↘ -1.66 | ▬ 0.0004 |
| 15  | Prolargin                       | IPI00190287 | 43 kDa  | ↘ -1.06 | ▬ 0.722 | ↘ -1.11 | ▬ 0.6318 |
| 88  | Tenascin-X                      | IPI00911228 | 127 kDa | ↘ 1.10  | ▬ 0.720 | ↘ 1.14  | ▬ 0.8594 |
| 343 | Tenascin-X (Fragment)           | IPI00948911 | 23 kDa  | ↘ 1.22  | ▬ 0.641 | ↘ -1.00 | ▬ 0.8689 |
| 924 | Versican core protein isoform 1 | IPI00957386 | 367 kDa | ↘ 1.11  | ▬ 0.905 | ↘ 1.32  | ▬ 0.9146 |

Ranking refers to ECM protein position in the whole proteome. ECM proteins in parous matrix were quantitated relative to nulliparous matrix using spectral counting and average total ion current (TIC) on MS/MS spectra. N=5 analyses from a single matrix sample per condition. Directions of arrows indicate whether protein abundances are increase (up), decrease (down), or unchanged (straight). For statistical values, yellow dot \*p<0.05 and green dot \*p<0.01 unpaired t-test.

**Table S2****Number of unique peptides from each ECM protein:**

|                  |                                | <b>Unique Peptides Used<br/>for Quantitation (N=5)</b> | <b>Sequence Coverage</b>         |
|------------------|--------------------------------|--------------------------------------------------------|----------------------------------|
| <b>Accession</b> | <b>Description</b>             | <b>Avg. (<math>\pm</math>SD)</b>                       | <b>Avg. (<math>\pm</math>SD)</b> |
| IPI00188909      | Collagen alpha-1 (I) chain     | 179.7 (10.5)                                           | 67.3 (5.8)                       |
| IPI00188921      | Collagen alpha-2 (I) chain     | 132.3 (16.6)                                           | 68.3 (4.0)                       |
| IPI00565677      | Collagen alpha-3 (VI) chain    | 121.3 (11.6)                                           | 50.3 (8.1)                       |
| IPI00366944      | Collagen alpha-1 (III) chain   | 111.7 (6.1)                                            | 57.3 (8.0)                       |
| IPI00360766      | Collagen alpha-1 (XIV) chain   | 113.7 (9.7)                                            | 62.7 (5.0)                       |
| IPI00951429      | Fibrillin 1                    | 99.0 (14.5)                                            |                                  |
| IPI00371853      | Collagen alpha-1 (VI) chain    | 45.3 (6.4)                                             | 48.0 (17.1)                      |
| IPI00200757      | Fibronectin                    | 28.7 (15.4)                                            |                                  |
| IPI00190088      | Periostin                      | 41.7 (5.5)                                             |                                  |
| IPI00372839      | Collagen alpha-2 (VI) chain    | 36.0 (1.7)                                             | 41.0 (11.8)                      |
| IPI00199861      | Decorin                        | 27.0 (1.0)                                             | 59.3 (8.4)                       |
| IPI00911228      | Tenascin X                     | 25.0 (2.0)                                             |                                  |
| IPI00190287      | Prolargin                      | 24.3 (0.6)                                             |                                  |
| IPI00206403      | Lumican                        | 18.0 (2.0)                                             |                                  |
| IPI00191090      | Biglycan                       | 17.7 (0.6)                                             |                                  |
| IPI00362931      | Osteoglycin                    | 17.7 (2.1)                                             |                                  |
| IPI00371512      | Dermatopontin                  | 12.0 (1.0)                                             |                                  |
| IPI00214859      | Collagen alpha-1 (XVIII) chain | 12.3 (1.5)                                             |                                  |
| IPI00326179      | Fibulin-5                      | 6.6 (0.6)                                              |                                  |
| IPI00201608      | Collagen alpha-1 (V) chain     | 3.3 (1.5)                                              |                                  |
| IPI00366945      | Collagen alpha-2 (V) chain     | 2.0 (1.7)                                              |                                  |
| IPI00211401      | Matrix Gla protein             | 2.0 (0.0)                                              |                                  |

The list includes average number of unique peptides from mammary ECM proteome of both nulliparous and parous rats detected via mass spectrometry. Percent coverage for selected ECM proteins is also included. B=band indicating the sequence coverage for a specific protein at that band only (specific MW range). N=5 analyses from a single matrix sample per group.

**Table S3. Mat/1X NF Col I unique gene signature**

[Download Table S3](#)

**Table S4****Custom DNA oligo sequences from IDT.com for RT-PCR**

| Gene Name      | Species |                           | Sequence                        |
|----------------|---------|---------------------------|---------------------------------|
| <i>Ifi44</i>   | Mouse   | Forward Sequence (5'->3') | TAC GTC AGA CAT TCG GGA AGC AGT |
|                |         | Reverse Sequence (5'->3') | AAA GAC AGC CAC TCA GGC GTA TCA |
| <i>Gjb2</i>    | Mouse   | Forward Sequence (5'->3') | AGG ATG AGG CAA CCC ATG CTT AGT |
|                |         | Reverse Sequence (5'->3') | AGA ATT GGG CCT TTG TTT GGG AGC |
| <i>Adamts1</i> | Mouse   | Forward Sequence (5'->3') | TGG ACA CGG GGA ATG TTT GAT     |
|                |         | Reverse Sequence (5'->3') | AGT ACA TGT GCT GGC TGC AT      |
| <i>Mmp14</i>   | Mouse   | Forward Sequence (5'->3') | GCC CTC TGT CCC AGA TAA GC      |
|                |         | Reverse Sequence (5'->3') | ACC ATC GCT CCT TGA AGA CA      |
| <i>Vcam1</i>   | Mouse   | Forward Sequence (5'->3') | TGG AGG TCT ACT CAT TCC CTG A   |
|                |         | Reverse Sequence (5'->3') | GAC AGG TCT CCC ATG CAC AA      |
